# Supplementary material
Source: Springer Nature journal article supplement (https://springermedizin.de/resource/supplementary/12885_2006_642_MOESM2_ESM.pdf/9469972)

**a**

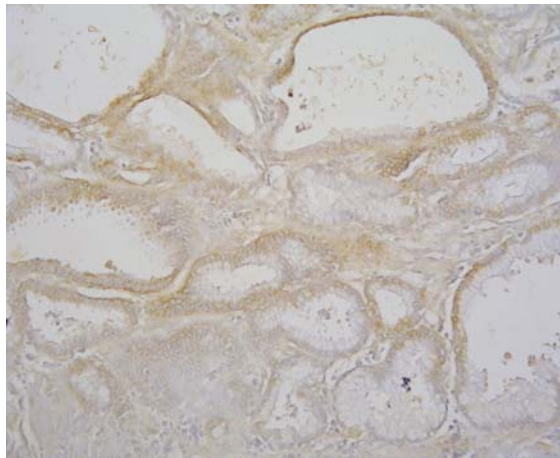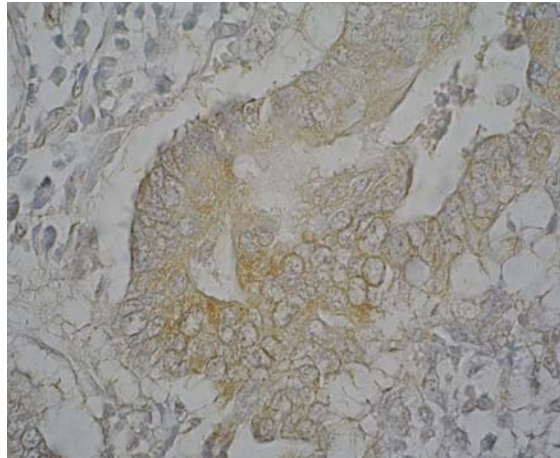

**b**

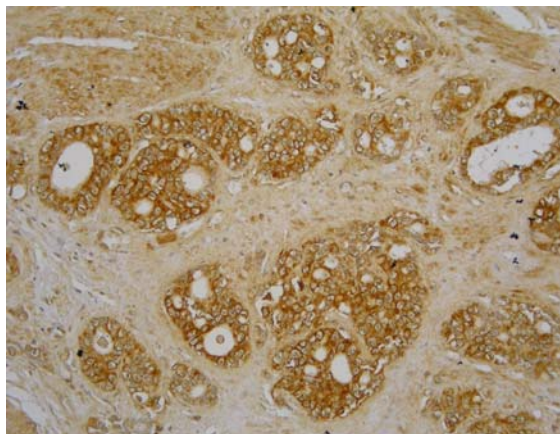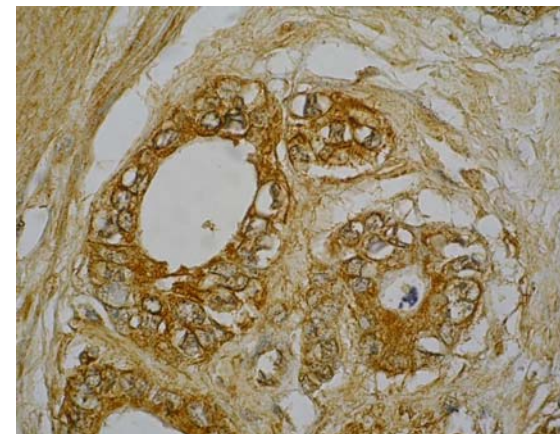

**c**

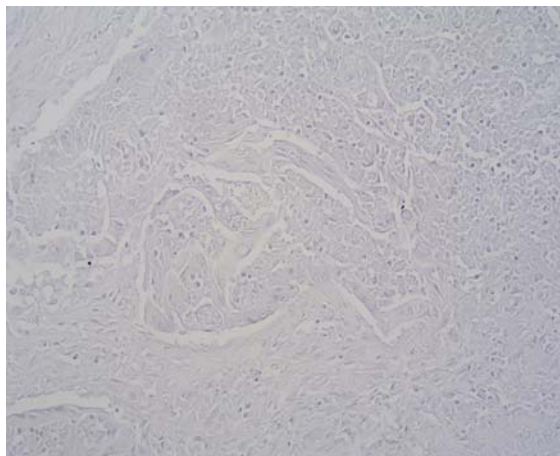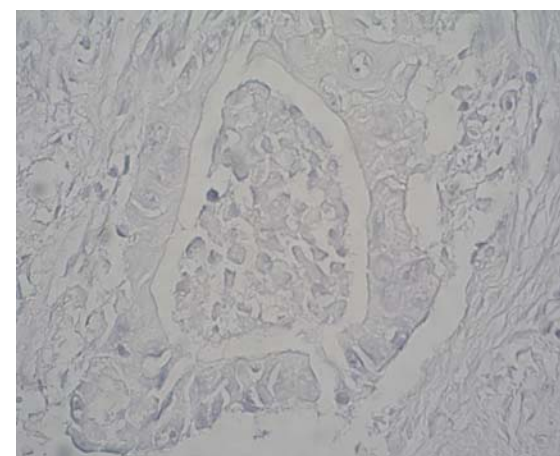

Supplement: MOESM2 [file 9469972]
